# Regulation of global translation during the cell cycle

---

Vilte Stonyte, Erik Boye and Beáta Grallert

Department of Radiation Biology, Institute for Cancer Research, Oslo University  
Hospital, Oslo, Norway

Corresponding author: Beáta Grallert [beata.grallert@rr-research.no](mailto:beata.grallert@rr-research.no)

Running title: Translation during the cell cycle

## Abstract

It is generally accepted that global translation varies during the cell cycle and is low in mitosis. However, addressing this issue is challenging because it involves cell synchronization, which evokes stress responses which, in turn, affect translation rates. Here we have used two approaches to measure global translation rates in different cell-cycle phases. First, synchrony in different cell-cycle phases was obtained involving the same stress, by using temperature-sensitive mutants. Second, translation and DNA content were measured by flow cytometry in exponentially growing, single cells. We found no major variation in global translation rates through the cell cycle in either fission-yeast or mammalian cells. We also measured phosphorylation of eukaryotic initiation factor-2 $\alpha$ , an event thought to downregulate global translation in mitosis. In contrast with the prevailing view, eIF2 $\alpha$  phosphorylation correlated poorly with downregulation of general translation and ectopically induced eIF2 $\alpha$  phosphorylation inhibited general translation only at high levels.

# 1        **Introduction**

2        It is one of the basic principles of cell proliferation that there is a link between general  
3        cell growth (protein synthesis) and cell-cycle regulation. Such a link is logical and has  
4        been hypothesized to exist, but its nature has been elusive. Protein synthesis is one of  
5        the most energy-demanding cellular processes and is therefore carefully regulated. It  
6        is a generally accepted view that global translation is considerably reduced in mitosis  
7        (reviewed in 1). The reduction is thought to result from altered phosphorylation state  
8        of translation initiation factors. In particular, phosphorylation of the translation  
9        initiation factor eIF2 $\alpha$  is induced after a number of different stresses and is thought to  
10        be the main reason for repressed translation. Cell-cycle-dependent downregulation of  
11        translation in G2/M phase was also attributed to increased eIF2 $\alpha$  phosphorylation (2-  
12        5).

13        Early translation measurements in synchronized mammalian cells revealed a 70%  
14        reduction of the global translation rate in mitosis (6). More recent studies using  
15        different synchronization methods suggested that the magnitude of the translation  
16        reduction depends on the method of synchronization (7,8). Also, studies in budding  
17        yeast indicated that the rate of protein synthesis is constant during the cell cycle  
18        (9,10). More recent studies (in mammalian cells) have reported conflicting results  
19        regarding the level of translational reduction in mitosis (11-13), and the question of  
20        whether and to what extent global translation is downregulated in mitosis remains  
21        unanswered.

22 Measurement of translation in different cell-cycle phases is challenging because it  
23 often involves cell-cycle synchronization, which in itself can evoke stress responses  
24 which, in turn, will affect translation rates. Thus, the exact contribution of the  
25 synchronization method versus cell-cycle progression to any observed change in  
26 translation rates or the phosphorylation state of translation initiation factors is difficult  
27 to assess. Here we use novel approaches to measure global translation rates during the  
28 cell cycle and whether it depends on eIF2 $\alpha$  phosphorylation.

29

30



## 31 **Results**

### 32 **Global translation in synchronized cells**

33 First, we utilized temperature-sensitive fission yeast mutants that arrest at different  
34 phases of the cell cycle. We synchronized the cells by shifting to the restrictive  
35 temperature before release into the cell cycle, achieving synchrony at different cell-  
36 cycle phases by the same treatment (ie temperature shift). Samples for analysis of  
37 DNA content, translation rate, and eIF2 $\alpha$  phosphorylation were taken every 20 min  
38 for 160 or 220 minutes after release from the cell-cycle arrest. DNA content and  
39 translation rate were measured in single cells, by flow cytometry. Translation was  
40 assayed by pulse-labelling with the methionine analogue L-Homopropargylglycine  
41 (HPG) (15), which is incorporated into growing polypeptide chains. It should be noted  
42 that our assay addresses the regulation of global translation rather than the well-  
43 established translational regulation of individual proteins. To reveal small differences  
44 in signal intensity, the samples were barcoded and processed together in the very  
45 same solution. Phosphorylation of eIF2 $\alpha$  was assessed by immunoblot analysis. The  
46 *cdc10-M17* mutant was used to synchronize cells in G1, *cdc25-22* was used to  
47 synchronize cells in G2 and *nda3-KM311* was used to arrest the cells in mitosis.

48 The rate of translation changed as the cells progressed from the block and through the  
49 cell cycle, apparently consistent with cell-cycle-dependent translation. However, the  
50 changes in translation rate followed the same pattern after release from the cell-cycle  
51 arrest regardless of when in the cell cycle the cells were synchronized (Fig 1A-D and

52 Fig S1). At early time points the translation rate was low and after release it gradually  
53 increased to a rate above that measured before the shift. At late timepoints translation  
54 rates became similar to that measured in exponentially growing cells. There was no  
55 correlation between any particular cell-cycle phase and an increase or decrease in  
56 translation rates. These results strongly suggest that global translation is not regulated  
57 in a cell-cycle-dependent manner and that the variations observed are caused by the  
58 synchronization.

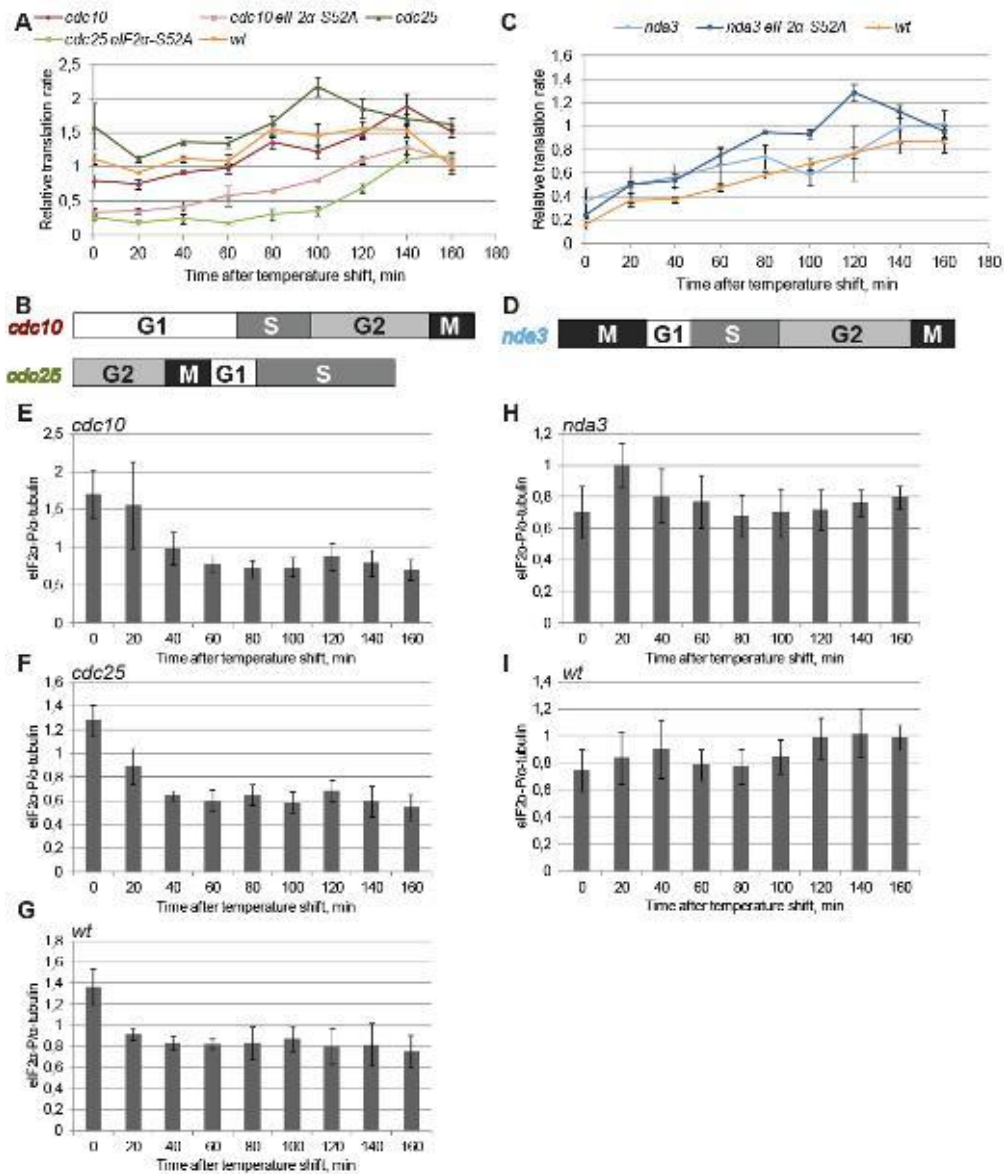

**Figure 1. Global translation in cells synchronized in the cell cycle**

Cells of the indicated strains were grown exponentially at 25°C (A, B, E-G) or 30°C (C, D, H, I), incubated at 36°C or 20°C for one generation time and then shifted back to 25 and 30°C, respectively. Samples were taken at the indicated times after the shift. A, C median intensities of the AF647 (HGP) signal normalized to that of exponentially growing cells. Average of three biological repeats and standard errors (SE) are shown. B, D illustrate cell-cycle progression in the respective mutants. Fig S1 shows the cell-cycle distributions E - I Quantification of eIF2α phosphorylation normalized to tubulin in the indicated strains. Average and SE of three independent experiments are shown. Representative immunoblots are shown in Fig S2.

59

60 To test the effects of a temperature shift, wild-type fission yeast cells were subjected

61 to the same shifts as employed to synchronize the cell-cycle mutants. Interestingly,

62 translation rates followed the same pattern in the wild-type cells as in the cell-cycle  
63 mutants described above (Fig 1A, C), demonstrating that the observed changes are  
64 due to the temperature shift rather than to the cell-cycle stage where the particular  
65 mutant arrests. Furthermore, the temperature shift from 25 to 36 back to 25 °C in itself  
66 induced a transient G2 delay (Fig S1G), which is probably due to the previously  
67 described Rad3<sup>ATR</sup>-Rad9-dependent mechanism (14). Curiously, also a shift from 30  
68 to 20 to 30°C induced a cell-cycle delay, but in G1/S (Fig S1H).

69 Phosphorylation of eIF2 $\alpha$  was high at the early time points in the heat-sensitive  
70 mutants, then gradually diminished (Fig 1 E, F), regardless of where in the cell cycle  
71 the particular mutant was arrested. There was no correlation between eIF2 $\alpha$   
72 phosphorylation and any particular cell-cycle phase. As a control to assess synchrony  
73 achieved in the above experiments, we followed expression of the G1 cyclin Cig2 by  
74 immunoblotting. The previously reported cell-cycle-dependent regulation was  
75 obvious in all three strains (Fig S1), showing that the synchrony achieved in the above  
76 experiments allows us to detect cell-cycle-dependent changes in protein levels.  
77 Furthermore, the temperature shift resulted in increased eIF2 $\alpha$  phosphorylation also in  
78 the wild-type cells (Fig 1G), confirming that such temperature shifts routinely  
79 employed in cell-cycle synchronization experiments invoke a stress response.

80 When cells were shifted from 20 to 30 °C, changes in eIF2 $\alpha$  phosphorylation were  
81 much less pronounced, be it wild-type cells or the cold-sensitive *nda3* mutant (Fig 1H,  
82 D). Notably, the *nda3* mutant arrests in metaphase, the very cell-cycle phase where  
83 eIF2 $\alpha$  phosphorylation is thought to increase and contribute to a downregulation of

84 translation. Furthermore, the biggest change in translation rate was observed in the  
85 cells shifted from 20 to 30 °C, both for wild-type cells and the *nda3* mutant(Fig 1C),  
86 although this treatment resulted in the smallest change in eIF2 $\alpha$  phosphorylation (Fig  
87 1 H, I). These results are in direct contradiction to the prevailing view that eIF2 $\alpha$   
88 phosphorylation correlates with and is the reason for downregulation of global  
89 translation.

90 To assess the contribution of eIF2 $\alpha$  phosphorylation to the observed changes in  
91 translation rates, strains carrying non-phosphorylatable *eIF2 $\alpha$ -S52A* were used. Cell-  
92 cycle synchronization experiments and translation measurements were performed as  
93 above. Surprisingly, translation rates followed exactly the same pattern in the absence  
94 of eIF2 $\alpha$  phosphorylation as in its presence; low immediately after the temperature  
95 shift, then recovering (Fig 1A, C). Furthermore, in the heat-sensitive mutants  
96 translation was much more downregulated when eIF2 $\alpha$  could not be phosphorylated  
97 (Fig 1A).

98 We conclude that the changes in translation rates during the cell-cycle  
99 synchronization experiments were not due to cell-cycle-specific regulation of  
100 translation, but to the temperature shift itself. Furthermore, phosphorylation of eIF2 $\alpha$   
101 is not cell-cycle regulated and is not required for the downregulation of global  
102 translation after temperature shift.

103

## 104 **Global translation in exponentially growing cells**

105 Having seen no evidence of cell-cycle dependent regulation of translation in  
106 synchronized cells, we set out to measure translation rates in different cell-cycle  
107 phases in unsynchronized cells. To this end, we measured HPG incorporation and  
108 DNA content in exponentially growing cells by flow cytometry. Cells in each cell-  
109 cycle phase were gated on two-parametric DNA cytograms (15) and HPG  
110 incorporation per cell was quantified in each cell-cycle phase. There were no  
111 significant differences in the rate of translation in the different cell-cycle phases (Fig  
112 2A,C). It should be noted that this method does not allow us to distinguish cells in  
113 mitosis from those in G1. Thus, a high translation rate in G1 cells might compensate  
114 for a reduced translation rate in the mitotic cells so that the relative translation rate for  
115 the mixed M-G1 population appears to be unchanged. However, in such a scenario the  
116 distribution of the HPG intensities in the M-G1 population would be broad, but this is  
117 not the case (Fig 2A, C), arguing against this explanation. Another concern is that a  
118 low number of mitotic cells in the population would conceal a low translation rate in  
119 mitotic cells. To address this issue, cells of the M-G1 population were sorted onto  
120 microscopy slides and the microtubuli were stained. At least 20 % of the cells clearly  
121 contained a mitotic spindle (data not shown), demonstrating that the translation rates  
122 measured in the M-G1 population reliably represent those of mitotic cells. In addition,  
123 we analyzed exponentially growing fission yeast cells grown in a medium with  
124 isoleucine as sole nitrogen source. Under these conditions G1 is longer and  
125 cytokinesis occurs in G1 (16), which allows us to distinguish a G1 population  
126 containing 1C DNA from mitotic cells. Also under these conditions, translation rates

127 were similar in the different cell-cycle phases (Fig 2B, D). These results obtained in  
128 unsynchronized, exponentially growing cells confirm that global translation does not  
129 vary significantly through the cell cycle.

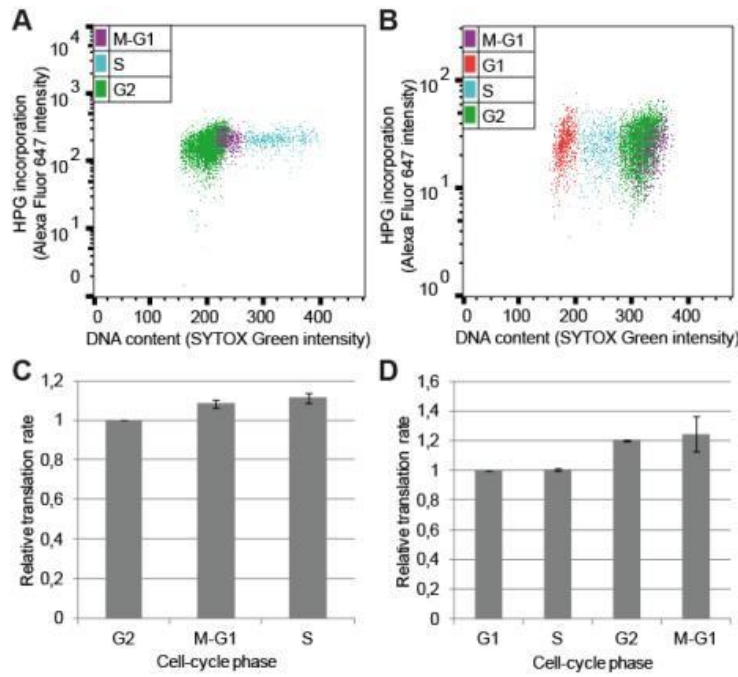

**Figure 2. Global translation in exponentially growing cells**

**A,B** Two-parametric flow cytometry plots of fission yeast cells grown in (A) EMM or (B) in isoleucine-minimal medium. **C, D** Average of median intensity of the AF647 signal normalized to G2 (C) or G1 (D) from at least three biological repeats with SE. Gating is shown on Fig S2.

130

131 Basic cellular processes such as regulation of translation through the cell cycle are  
132 expected to be conserved in evolution, but the extent of such regulation might vary  
133 from organism to organism. Therefore, we investigated whether the level of global  
134 translation varies during the cell cycle in human cells. To this end, we measured  
135 translation rates in different cell-cycle phases in three different human cell lines. To  
136 measure translation, unsynchronized cells were pulse-labelled with the puromycin

137 analogue O-propargyl-puromycin (OPP) and analyzed by flow cytometry. Cells in  
138 G1, S and G2 were identified based on their DNA content and mitotic cells were  
139 identified using the mitotic marker phospho-S10-histone H3. The cell lines  
140 investigated were normal epithelial RPE cells immortalized by telomerase expression,  
141 the osteosarcoma-derived U2OS cells and cervix carcinoma-derived HeLa cells.  
142 There is a wide distribution of the intensity of the OPP signal in the G1 population,  
143 indicating that there are significant differences in translation rates among G1 cells.  
144 This feature is particularly obvious in the normal epithelial RPE cells, less  
145 pronounced in the two cancer cell lines (Fig 3). The G1 cells with lower translation  
146 rates might represent cells that have not yet passed the restriction point. There is a  
147 gradual increase in translation from G1 phase through S to G2 in all three cell lines,  
148 and a somewhat lower rate in mitotic cells. However, the rate of protein synthesis in  
149 mitotic cells is higher or similar to that in G1 cells and the extent of reduction from  
150 G2 to M ranges from 40% (RPE) to 15 % (U2OS).



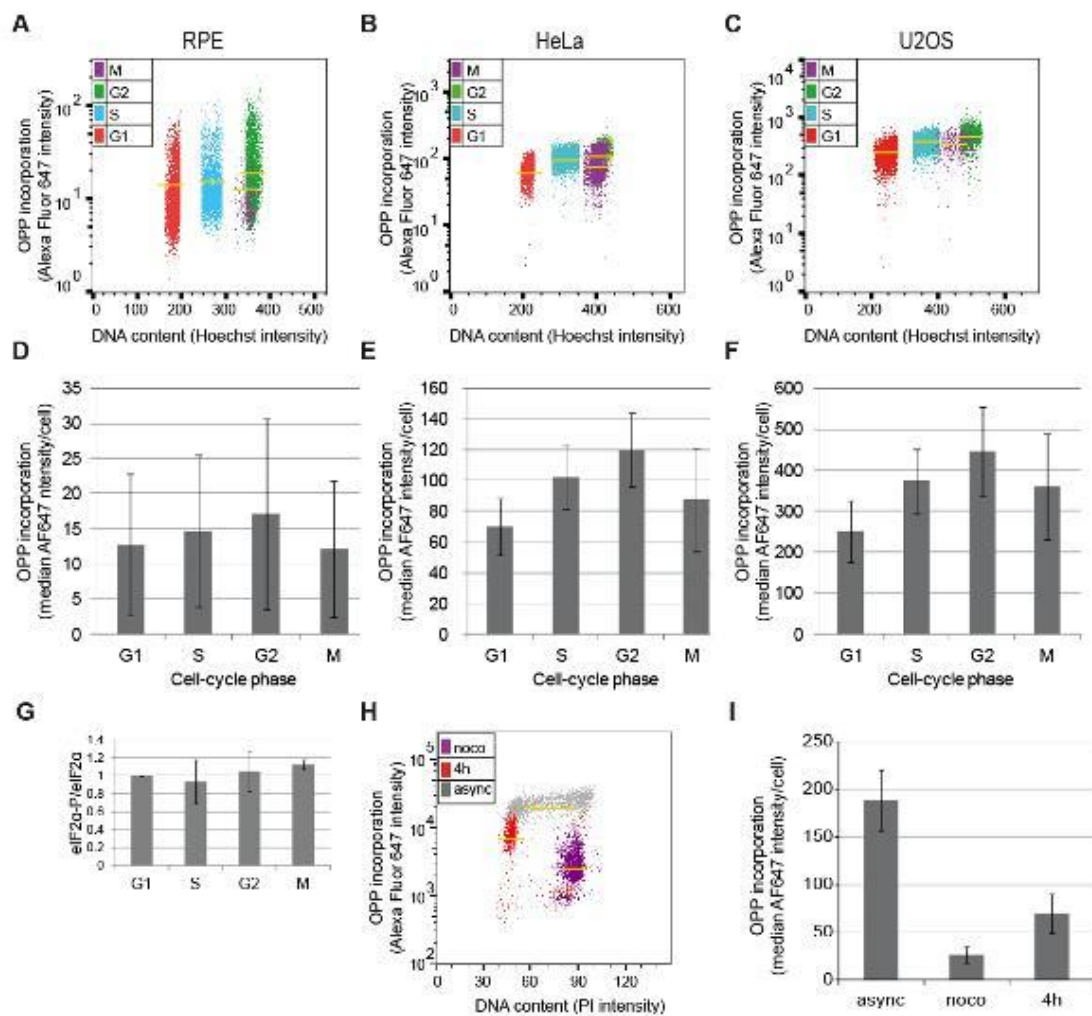

**Figure 3. Global translation through the cell cycle in human cells**

**A-C** Two-parametric flow cytometry plots of the indicated cell lines. Yellow lines represent the mean intensity of AF647 (OPP) for each cell-cycle phase. Bar graphs showing mean intensities and standard deviation are shown in Fig S3. **D-F** Bar graphs representing mean AF647 (OPP) intensity with standard deviation. **G** Quantification of eIF2 $\alpha$  phosphorylation normalized to eIF2 $\alpha$  in the indicated cell-cycle phases. Exponentially growing HeLa cells were fixed and stained for H3-P and DNA content to identify cells in each cell-cycle phase and then 50 000 cells from each phase were sorted to measure eIF2 $\alpha$  phosphorylation. Average and SE of three independent experiments are shown. Representative immunoblots are shown in Fig S3. **H** Two-parametric flow cytometry plots of asynchronously growing and nocodazole-arrested cells and cells 4 h after release from the nocodazole block. **I** Bar graphs representing mean AF647 (OPP) intensity with standard deviation after nocodazole block and release. eIF2 $\alpha$  phosphorylation is shown in Fig S3.

151

152 Phosphorylation of eIF2 $\alpha$  was investigated in HeLa cells. Unsynchronized cells were

153 fixed, analysed as above and collected by fluorescence-activated cell sorting (FACS).

154 Phosphorylation of eIF2 $\alpha$  was investigated in the different populations by  
155 immunoblotting. There were no significant changes in eIF2 $\alpha$  phosphorylation during  
156 the cell cycle (Fig 3G).

157 The above results strongly suggest that the previously observed apparent cell-cycle-  
158 dependent variation in translation rates was a result of synchronization. In order to  
159 directly address this, we synchronized HeLa cells using nocodazole and mitotic shake-  
160 off and measured the translation rates. Consistent with previous studies, translation  
161 rates changed dramatically in the nocodazole-treated cells (Fig 3H, I) and eIF2 $\alpha$   
162 phosphorylation increased upon nocodazole arrest (Fig S3).

163 These findings strongly suggest that global translation rates are not dramatically  
164 downregulated in mitotic cells and that earlier studies overestimated the extent of  
165 variation through the cell cycle.

## 166 **eIF2 $\alpha$ phosphorylation and general translation**

167 Surprisingly poor correlation was observed between the levels of eIF2 $\alpha$   
168 phosphorylation and global translation in the temperature-shift experiments,  
169 prompting us to directly address the importance of eIF2 $\alpha$  phosphorylation on global  
170 translation rates.

171 To this end, we expressed PKR, one of the four human eIF2 $\alpha$  kinases, in fission yeast  
172 and measured eIF2 $\alpha$  phosphorylation and the global translation rates. PKR expression  
173 was controlled by the regulatable *nmt1* promoter, which is induced when thiamine is  
174 removed from the medium (17,18). We used two different versions of the promoter,  
175 providing two different expression levels of PKR. Cells were grown exponentially  
176 with the promoter repressed before PKR expression was induced and global  
177 translation rates as well as eIF2 $\alpha$  phosphorylation were measured during the first  
178 24 hours (6 generations) after induction. PKR expression was detected at 13 hours after  
179 induction and eIF2 $\alpha$  phosphorylation reached maximal values at 16 - 19 hours (Fig  
180 4A, B and S4). The extent of eIF2 $\alpha$  phosphorylation induced by PKR driven by the  
181 weaker promoter was comparable to that induced by milder stresses (Fig 4C and S4).  
182 Curiously, we did not see any significant decrease in global translation rates when  
183 PKR was expressed from the weaker of the promoters, the rate of translation remained  
184 similar to that before induction of PKR expression. (Fig 4D). However, in the cells  
185 expressing PKR from the full-strength *nmt* promoter translation was strongly reduced  
186 and, consistently, these cells could not form colonies when the promoter was  
187 derepressed (not shown). These results are consistent with previous findings,  
188 suggesting that extreme and lasting eIF2 $\alpha$  phosphorylation can inhibit global

189 translation and is lethal (19,20). We conclude that the extent of eIF2 $\alpha$  phosphorylation  
190 is crucial for the effect on downregulation of general translation. A very high level of  
191 eIF2 $\alpha$  phosphorylation blocks translation, but an intermediate level might have little  
192 influence on global translation.

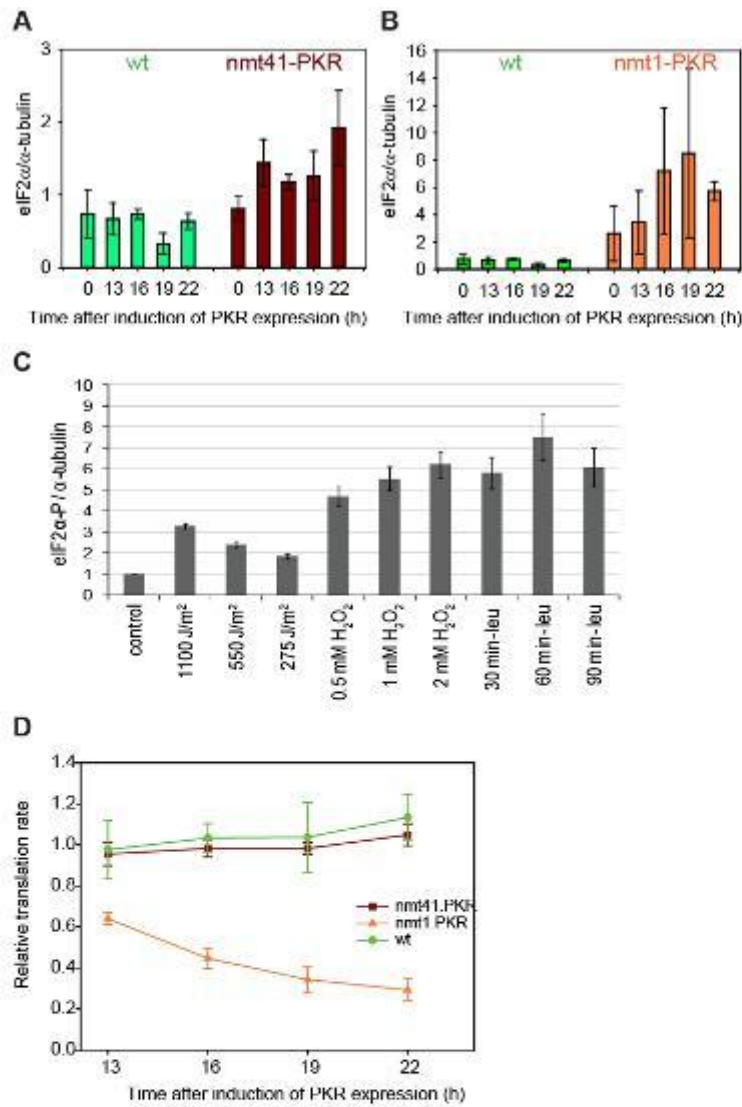

#### Figure 4. eIF2α phosphorylation and general translation

Cells carrying the indicated plasmids were grown exponentially with the promoter repressed and one sample was taken to measure translation. The promoter was induced for the indicated times. **A, B** Quantification of eIF2α phosphorylation normalized to α-tubulin at the indicated time points when PKR is expressed from the two different promoters. Note the different scales on the y axes. Representative immunoblots are shown in Fig S4. **C** Quantification of eIF2α phosphorylation normalized to tubulin after the indicated stresses. Average and SE of three independent experiments are shown. **D** Median intensities of the AF647 (HGP) signal normalized to that of exponentially growing cells (promoter repressed). Average of three biological repeats and SE are shown.

## 194 **Discussion**

### 195 **Global translation rate changes little during the cell cycle**

196 Many recent studies dispute the generally accepted view that global translation  
197 varies in a cell-cycle-dependent manner and is low in mitosis. Our results suggest that  
198 the discrepancies arise from experimental challenges. Studies of cell-cycle-related  
199 events often involve synchronization of cell cultures. In this work, we employed  
200 temperature-sensitive yeast mutants. It should be noted that studies on heat stress  
201 generally employ higher temperatures (>40 °C) and the temperatures we used are  
202 close to those in the natural environment of fission yeast cells. However, here we  
203 show that even the temperature shifts routinely used to synchronize the temperature-  
204 sensitive *S. pombe* mutants invoke a cellular stress response by themselves and  
205 influence global translation rates, supporting the idea that previously reported cell-  
206 cycle-dependent changes in translation rates are caused by the method of  
207 synchronization. Using the same stress to synchronize cells in different cell-cycle  
208 phases allowed us to separate the effects of cell-cycle progression from temperature  
209 shift on global translation rates. It is possible that, in our experiments, modest cell-  
210 cycle-dependent variations in global translation rates could be concealed by imperfect  
211 synchrony. However, the synchrony achieved in the block-and-release experiments  
212 (Fig S1) should have allowed us to observe the dramatic changes described  
213 previously. Furthermore, using flow cytometry to measure translation in exponentially  
214 growing cells allowed us to investigate global translation rates in different cell-cycle  
215 phases in unstressed cells.

216 One caveat of analyzing the cell cycle of fission yeast by flow cytometry is that  
217 mitotic cells can only be identified after separation of the daughter nuclei, but cells in  
218 the early phases of mitosis cannot be distinguished from cells in G2. Thus, a reduction  
219 of global translation rates in metaphase would not be detected using asynchronously  
220 growing cells and flow cytometry alone, although it would have been detected in the  
221 block-and-release experiments. Collectively, these data demonstrate that global  
222 translation is not significantly different between any of the cell-cycle phases in fission  
223 yeast cells.

224 In the human cell lines we also saw only small changes in the translation rate,  
225 consistent with recent studies reporting only minor variations. Mitotic cells were  
226 identified based on histone H3 phosphorylation, a mitotic marker that is present both  
227 in metaphase and anaphase. Notably, our approach did not involve any  
228 synchronization method, exposure to chemicals or changes in the cellular  
229 environment, which makes our results less subject to artifacts and methodical  
230 problems. Furthermore, when we synchronized the cells we also observed the  
231 previously reported variations, confirming the notion that the changes in translation  
232 are due to the synchronization-induced stress rather than cell-cycle progression.

### 233 **Phosphorylated eIF2 $\alpha$ does not significantly repress global** 234 **translation**

235 Under stressful conditions cells reduce the rate of global translation to conserve  
236 resources (21). At the same time, synthesis of proteins necessary to survive the stress  
237 is maintained or even increased. Many different forms of stress results in



238 phosphorylation of eIF2 $\alpha$  in eukaryotic cells (22,23) and it is thought to be required  
239 for both responses; downregulation of general translation and upregulation of  
240 translation of selected mRNAs. In addition, it is also implicated in the cell-cycle-  
241 dependent regulation of translation. Here we find that increased eIF2 $\alpha$   
242 phosphorylation does not correlate with any particular cell-cycle phase, but rather  
243 with the stress involved in synchronization, be it temperature shift or exposure to  
244 nocodazole. We conclude that eIF2 $\alpha$  phosphorylation is not regulated in a cell-cycle-  
245 dependent manner.

246 There is compelling evidence that eIF2 $\alpha$  phosphorylation can attenuate the translation  
247 of mRNAs (24,25). The regulation of eIF2 $\alpha$  phosphorylation is relevant for a number  
248 of diseases, such as neurodegenerative disorders, cancer and autoimmune diseases  
249 (26-31). In all these fields, increased levels of phosphorylated eIF2 $\alpha$  has commonly  
250 been taken to be a readout of reduced general translation. However, the two  
251 parameters have rarely been measured in the same experiment. Our results  
252 demonstrate that there is poor correlation between eIF2 $\alpha$  phosphorylation and  
253 repressed general translation. First, eIF2 $\alpha$  phosphorylation is clearly not required for  
254 the temperature-shift-induced downregulation of translation (Fig 1), consistent with  
255 previous findings after UVC irradiation, oxidative stress and ER stress (32-34).  
256 Second, in the absence of eIF2 $\alpha$  phosphorylation translation is repressed more  
257 dramatically after temperature shift (Fig 1). Third, ectopically induced eIF2 $\alpha$   
258 phosphorylation did not noticeably downregulate global translation in unstressed  
259 fission yeast cells, unless it was induced to high levels (Fig 4). We suggest that the  
260 impact of phosphorylated eIF2 $\alpha$  on global translation has been overestimated in the



261 literature and that eIF2 $\alpha$  phosphorylation can not be used as a marker of  
262 downregulated translation. Our results demonstrate that the extent of eIF2 $\alpha$   
263 phosphorylation is crucial to determine whether it impacts on general translation and  
264 it has only a minor effect on the global translation at levels observed after mild  
265 stresses. This implies that the main consequence of eIF2 $\alpha$  phosphorylation is not  
266 downregulation of general translation but most likely translation of selected mRNAs,  
267 as also suggested previously (35).

## 268 **Materials and Methods**

### 269 **Cells and cell handling**

270 All fission yeast strains used in this study are derivatives of *S. pombe* L972 h- wild-  
271 type strain (Leupold, 1950) and are listed in Table 1.

#### 272 **Table 1 Fission yeast strains used in this study**

---

|      |                                                  |
|------|--------------------------------------------------|
| 19   | <i>L972 h-</i>                                   |
| 489  | <i>cdc10-M17 h-</i>                              |
| 550  | <i>cdc25-22 h+</i>                               |
| 1711 | <i>nda3-KM311 cdt1:TAP:kanMX6 ura4-D18 h-</i>    |
| 1244 | <i>cdc10-M17 eIF2alphaS52A:ura4+ ura4-D18 h+</i> |
| 2115 | <i>eIF2alphaS52A:ura4+ ura4-D18 nda3-KM311</i>   |
| 2126 | <i>eIF2alphaS52A:ura4+ ura4-D18 cdc25-22</i>     |
| 38   | <i>ura4-D18 leu1-32 h-</i>                       |

---

273 Cells were maintained and cultured as previously described (Moreno 1991). The cells  
274 were grown in liquid Edinburgh minimal medium (EMM) with appropriate  
275 supplements at 25 °C (or at 30 °C for *nda3-KM311* cells) to a cell concentration of 2-  
276  $4 \times 10^6$ /ml. The cells were synchronised in G1 or G2 phase by incubating *cdc10-M17*  
277 or *cdc25-22* cells, respectively, at 36 °C for 4 h (or 5 h for *cdc10-M17 eIF2alphaS52A*  
278 strain) before release into the cell cycle at 25 °C; in M phase by incubating *nda3-*  
279 *KM311* cells at 20 °C for 4 h before release into the cell cycle at 30 °C. To obtain a  
280 population of mononuclear G1 cells, cultures were maintained at 30 °C in minimal  
281 medium where NH<sub>4</sub>Cl was replaced with 20 mM L-isoleucine (Carlson et al., 1999).

282 Cultures of *S. pombe* transformants (together with a wild-type control culture) were  
283 grown to a cell concentration of  $8 \times 10^6$ /ml ( $OD_{595} = 0.4$ ) in minimal medium where  
284  $NH_4Cl$  was replaced with 3.75 g/l L-glutamic acid, monosodium salt (Pombe  
285 Glutamate medium, PMG). To induce human PKR expression, cells cultured in PMG  
286 containing 5  $\mu$ g/ml thiamine (Sigma-Aldrich) were harvested by centrifuging for  
287 3 min at 3 000 rpm, washed three times with PMG without thiamine, and resuspended  
288 in PMG lacking thiamine for the induction of *nmt1* and *nmt41* promoters.

289 Human HeLa and U2OS cells were cultivated in Dulbecco's modified Eagle's  
290 Medium (DMEM) (Gibco) and Tert-RPE cells were cultivated in DMEM-F-12  
291 (Gibco) supplemented with 10% fetal bovine serum and 1% Penicillin/Streptomycin  
292 at 37°C in a humidified environment with 5% CO<sub>2</sub>.

### 293 **Cell-cycle analyses**

294 Cell-cycle phases were identified in fission yeast by DNA staining (Sytox Green) as  
295 described (15). In mammalian cells DNA staining (Hoechst or propidium iodide) and  
296 phospho-histone H3 (Ser10) staining were employed.

### 297 **Translation assays**

298 To label newly synthesized proteins, 50  $\mu$ M of L-homopropargylglycine (HPG,  
299 Thermo Fisher Scientific) was added to 1 ml samples of the main yeast culture taken  
300 out 10 min before the indicated time points. To stop translation, 0.1 mg/ml of  
301 cycloheximide (CHX) was added after 10 min. Cells were fixed in ice-cold methanol  
302 or 70 % ethanol, washed in 0.5 ml TBS and barcoded using up to five different

303 concentration (450, 124.8, 31.2, 6.24, and 0.78 ng/ml) of Pacific Blue (PB; Thermo  
304 Fisher Scientific) dye for 30 min in the dark at room temperature. Samples were then  
305 washed three times in 0.5 ml TBS and pooled together. The samples were  
306 permeabilised with 0.5 ml 1 % Triton X-100 in TBS, and blocked with 1 % BSA in  
307 TBS. To detect HPG, Alexa Fluor 647 was linked to the incorporated HPG in a  
308 ‘click’ reaction (Liang, Astruc, 2011) using the Click-iT cell reaction buffer kit  
309 (Thermo Fisher Scientific C10269) following the manufacturer’s protocol to ligate the  
310 HPG alkyne with a fluorescent azide. Incorporation was quantified by using flow  
311 cytometry (LSR II flow cytometer, BD Biosciences). SYTOX Green dye (Thermo  
312 Fisher Scientific) was used to stain the DNA. Cell doublets were excluded from the  
313 analysis as described previously (Knutsen, 2011). Samples without HPG were used as  
314 negative controls.

315 O-propargyl-puromycin (OPP), (Thermo Fisher Scientific) was added to 6  $\mu$ M for  
316 20 min, the cells were then trypsinized and fixed in 70% ethanol. To detect  
317 incorporated OPP, the fixed cells were washed once in PBS with 1 % FBS. OPP  
318 was ligated with Alexa Fluor 647 in a 'click' reaction following the  
319 manufacturer's instructions. The samples were incubated for 5 min in detergent  
320 buffer (0.1 % Igepal CA-630, 6.5 mM Na<sub>2</sub>HPO<sub>4</sub>, 1.5 mM KH<sub>2</sub>PO<sub>4</sub>, 2.7 mM KCl,  
321 137 mM NaCl, 0.5 mM EDTA (pH 7.5)) containing 4 % non-fat milk to block non-  
322 specific binding. The cells were incubated for 1 h with anti-phospho-histone H3  
323 (Ser10) primary antibody (1:500, Millipore 06-570) in detergent buffer  
324 containing 2 % non-fat milk, washed once in PBS with 1 % FBS, and incubated for  
325 30 min with Alexa Flour 488-linked secondary antibody (1:500, Thermo Fisher  
326 Scientific A-11034) in detergent buffer. All incubations were carried out in the  
327 dark at room temperature. The cells were washed once in PBS with 1 % FBS and  
328 stained with 1.5  $\mu$ g/ml of Hoechst 33258 (Sigma) in PBS. The samples were  
329 analysed using flow cytometry (LSR II flow cytometer, BD Bioscience, San Jose,  
330 CA, USA). Samples without OPP and without the primary antibody were used as  
331 negative controls.

### 332 **Fluorescence activated cell sorting**

333 Exponentially growing cells were fixed with 70% EtOH and stained for anti-phospho-  
334 histone H3 as described above and detected using Alexa-fluor 647-coupled secondary  
335 antibody. DNA was stained with 8  $\mu$ g/ml propidium iodide. 50 000 cells from each  
336 cell-cycle phase were harvested using a FACS Aria II cell sorter.

337

### 338 **UVC irradiation**

339 Fission yeast cells were irradiated with 254 nm UV light (UVC) in a suspension in  
340 EMM (or PMG) medium under continuous stirring to ensure equal irradiation dose  
341 (Nilssen, 2003). The incident dose was measured with a radiometer (UV Products). A  
342 surface dose of 1100 J/m<sup>2</sup> (at a dose rate of approximately 250 J/m<sup>2</sup>/min) induces a  
343 checkpoint response, but results in over 90 % cell survival. Samples for protein  
344 analysis were taken immediately after irradiation.

### 345 **H<sub>2</sub>O<sub>2</sub> treatment**

346 Cells grown in PMG medium were treated with H<sub>2</sub>O<sub>2</sub> at the indicated concentrations  
347 for 15 minutes before samples were taken.

### 348 **Leucine starvation**

349 An auxotroph strain was grown in PMG medium supplemented with leucine. The  
350 cells were washed with PMG medium three times and incubated in medium not  
351 containing leucine for the indicated times.

### 352 **Immunoblotting**

353 Total protein extracts of yeast cells were obtained using a low salt buffer (25 mM  
354 MOPS (pH 7.1), 60 mM β-glycerophosphate, 15 mM p-nitrophenylphosphate, 15 mM  
355 MgCl<sub>2</sub>, 15 mM EGTA (pH 8.0), 1 mM DTT, 0.1 mM Na<sub>3</sub>VO<sub>4</sub>, 1 % Triton X-100)  
356 supplemented with protease inhibitors (Roche). Cell debris was removed by

357 centrifugation at 14 000 g for 15 min at 4 °C. The extracts were mixed with 4× LDS  
358 Sample Buffer (Thermo Fisher Scientific) and 50 mM DTT.

359 Human cells were lysed in Laemmli sample buffer.

360 Extracts were run on polyacrylamide gels, transferred onto PVDF membranes, and  
361 probed with antibodies against phospho-eIF2 $\alpha$  (1:750, CST 3398), eIF2 $\alpha$  (1:1000,  
362 Santa Cruz sc-11386) PKR (1:3000, Abcam 32052),  $\alpha$ -tubulin (1:30 000, Sigma-  
363 Aldrich T5168) and  $\gamma$ -tubulin (1:30 000, ). The signal intensities were quantified  
364 using ImageJ software.

## 365 **Acknowledgements**

366 We are grateful to the Norwegian Cancer Society, the Norwegian South-Eastern  
367 Health Authority and Radiumhospitalets Legater for funding and thank L.  
368 Lindbergsengen and M. O. Haugli for excellent technical assistance. The funders had  
369 no role in study design, data collection and interpretation, or the decision to submit  
370 the work for publication.



371 **Competing interests**

372 The authors declare no competing interests.

## References

- 374 1. Sivan G and Elroy-Stein O. 2008. Regulation of mRNA Translation during  
375 cellular division. *Cell Cycle*, 7: 741-744.
- 376 2. Datta B, Datta R, Mukherjee S and Zhang Z. 1999. Increased Phosphorylation  
377 of Eukaryotic Initiation Factor 2 $\alpha$  at the G2/M Boundary in Human  
378 Osteosarcoma Cells Correlates with Deglycosylation of p67 and a Decreased  
379 Rate of Protein Synthesis. *Experimental Cell Research*, 250: 223-230.
- 380 3. Tinton Sandrine A, Schepens B, Bruynooghe Y, Beyaert R and Cornelis S.  
381 2005. Regulation of the cell-cycle-dependent internal ribosome entry site of  
382 the PITSLRE protein kinase: roles of Unr (upstream of N-ras) protein and  
383 phosphorylated translation initiation factor eIF-2 $\alpha$ . *Biochemical Journal*, 385:  
384 155-163.
- 385 4. Silva RC, Dautel M, Di Genova BM, Amberg DC, Castilho BA and Sattlegger  
386 E. 2015. The Gcn2 Regulator Yih1 Interacts with the Cyclin Dependent  
387 Kinase Cdc28 and Promotes Cell Cycle Progression through G2/M in Budding  
388 Yeast. *PLoS One*, 10: e0131070.
- 389 5. Kim Y, Lee JH, Park J-E, Cho J, Yi H and Kim VN. 2014. PKR is activated  
390 by cellular dsRNAs during mitosis and acts as a mitotic regulator. *Genes &*  
391 *Development*, 28: 1310-1322.
- 392 6. Fan H and Penman S. 1970. Regulation of protein synthesis in mammalian  
393 cells. II. Inhibition of protein synthesis at the level of initiation during mitosis.  
394 *J Mol Biol*, 50: 655-670.
- 395 7. Coldwell MJ, Cowan JL, Vlasak M, Mead A, Willett M, Perry LS and Morley  
396 SJ. 2013. Phosphorylation of eIF4GII and 4E-BP1 in response to nocodazole  
397 treatment: a reappraisal of translation initiation during mitosis. *Cell Cycle*, 12:  
398 3615-3628.
- 399 8. Shuda M, Velasquez C, Cheng E, Cordek DG, Kwun HJ, Chang Y and Moore  
400 PS. 2015. CDK1 substitutes for mTOR kinase to activate mitotic cap-  
401 dependent protein translation. *PNAS, Proceedings of the National Academy of*  
402 *Sciences*, 112: 5875-5882.
- 403 9. Elliott SG and McLaughlin CS. 1978. Rate of macromolecular synthesis  
404 through the cell cycle of the yeast *Saccharomyces cerevisiae*. *Proceedings of*  
405 *the National Academy of Sciences of the United States of America*, 75: 4384-  
406 4388.
- 407 10. Elliott SG, Warner JR and McLaughlin CS. 1979. Synthesis of ribosomal  
408 proteins during the cell cycle of the yeast *Saccharomyces cerevisiae*. *J*  
409 *Bacteriol*, 137: 1048-1050.
- 410 11. Shuda M, Chang Y and Moore PS. 2015. Mitotic 4E-BP1  
411 hyperphosphorylation and cap-dependent translation. *Cell cycle*, 14: 3005-  
412 3006.
- 413 12. Stumpf CR, Moreno MV, Olshen AB, Taylor BS and Ruggero D. 2013. The  
414 translational landscape of the mammalian cell cycle. *Molecular cell*, 52: 574-  
415 582.

- 416 13. Tanenbaum ME, Stern-Ginossar N, Weissman JS and Vale RD. 2015.  
417 Regulation of mRNA translation during mitosis. *eLife*, 4: e07957.
- 418 14. Janes S, Schmidt U, Ashour Garrido K, Ney N, Concilio S, Zekri M and  
419 Caspari T. 2012. Heat induction of a novel Rad9 variant from a cryptic  
420 translation initiation site reduces mitotic commitment. *Journal of Cell Science*,  
421 125: 4487-4497.
- 422 15. Knutsen JH, Rein ID, Rothe C, Stokke T, Grallert B and Boye E. 2011. Cell-  
423 cycle analysis of fission yeast cells by flow cytometry. *PLoS One*, 6: e17175.
- 424 16. Carlson CR, Grallert B, Stokke T and Boye E. 1999. Regulation of the start of  
425 DNA replication in *Schizosaccharomyces pombe*. *Journal of Cell Science*,  
426 112: 939-946.
- 427 17. Maundrell K. 1993. Thiamine-repressible expression vectors pREP and pRIP  
428 for fission yeast. *Gene*, 123: 127-130.
- 429 18. Basi G, Schmid E and Maundrell K. 1993. TATA box mutations in the  
430 *Schizosaccharomyces pombe* nmt1 promoter affect transcription efficiency but  
431 not the transcription start point or thiamine repressibility. *Gene*, 123: 131-136.
- 432 19. Dever TE, Chen JJ, Barber GN, Cigan AM, Feng L, Donahue TF, London IM,  
433 Katze MG and Hinnebusch AG. 1993. Mammalian eukaryotic initiation factor  
434 2 alpha kinases functionally substitute for GCN2 protein kinase in the GCN4  
435 translational control mechanism of yeast. *Proceedings of the National  
436 Academy of Sciences of the United States of America*, 90: 4616-4620.
- 437 20. Zhan K, Vattem KM, Bauer BN, Dever TE, Chen JJ and Wek RC. 2002.  
438 Phosphorylation of eukaryotic initiation factor 2 by heme-regulated inhibitor  
439 kinase-related protein kinases in *Schizosaccharomyces pombe* is important for  
440 resistance to environmental stresses. *Mol Cell Biol*, 22: 7134-7146.
- 441 21. Holcik M and Sonenberg N. 2005. Translational control in stress and  
442 apoptosis. *Nature Reviews Molecular Cell Biology*, 6: 318-327.
- 443 22. Sonenberg N and Hinnebusch AG. 2009. Regulation of translation initiation in  
444 eukaryotes: mechanisms and biological targets. *Cell*, 136: 731-745.
- 445 23. Clemens MJ. 2001. Initiation factor eIF2 alpha phosphorylation in stress  
446 responses and apoptosis. *Progress in molecular and subcellular biology*, 27:  
447 57-89.
- 448 24. Hinnebusch AG. 1994. The eIF-2 alpha kinases: regulators of protein  
449 synthesis in starvation and stress. *Seminars in cell biology*, 5: 417-426.
- 450 25. Harding HP, Zhang Y, Zeng H, Novoa I, Lu PD, Calfon M, Sadri N, Yun C,  
451 Popko B, Paules R, Stojdl DF, Bell JC, Hettmann T, Leiden JM and Ron D.  
452 2003. An integrated stress response regulates amino acid metabolism and  
453 resistance to oxidative stress. *Mol Cell*, 11: 619-633.
- 454 26. Fullwood MJ, Zhou W and Shenolikar S. 2012. Targeting phosphorylation of  
455 eukaryotic initiation factor-2alpha to treat human disease. *Progress in  
456 molecular biology and translational science*, 106: 75-106.
- 457 27. Marchal JA, Lopez GJ, Peran M, Comino A, Delgado JR, Garcia-Garcia JA,  
458 Conde V, Aranda FM, Rivas C, Esteban M and Garcia MA. 2014. The impact  
459 of PKR activation: from neurodegeneration to cancer. *FASEB journal : official  
460 publication of the Federation of American Societies for Experimental Biology*,  
461 28: 1965-1974.

- 462 28. Ohno M. 2014. Roles of eIF2 $\alpha$  kinases in the pathogenesis of Alzheimer's  
463 disease. *Frontiers in molecular neuroscience*, 7: 22.
- 464 29. Koromilas AE. 2015. Roles of the translation initiation factor eIF2 $\alpha$  serine  
465 51 phosphorylation in cancer formation and treatment. *Biochimica et*  
466 *biophysica acta*, 1849: 871-880.
- 467 30. Ravindran R, Loebbermann J, Nakaya HI, Khan N, Ma H, Gama L, Machiah  
468 DK, Lawson B, Hakimpour P, Wang Y-c, Li S, Sharma P, Kaufman RJ,  
469 Martinez J and Pulendran B. 2016. The amino acid sensor GCN2 controls gut  
470 inflammation by inhibiting inflammasome activation. *Nature*, 531: 523-527.
- 471 31. Way SW and Popko B. 2016. Harnessing the integrated stress response for the  
472 treatment of multiple sclerosis. *The Lancet Neurology*, 15: 434-443.
- 473 32. Knutsen JHJ, Rødland GE, Bøe CA, Håland TW, Sunnerhagen P, Grallert B  
474 and Boye E. 2015. Stress-induced inhibition of translation independently of  
475 eIF2 $\alpha$  phosphorylation. *Journal of Cell Science*, 128: 4420-4427.
- 476 33. Hamanaka RB, Bennett BS, Cullinan SB and Diehl JA. 2005. PERK and  
477 GCN2 Contribute to eIF2 $\alpha$  Phosphorylation and Cell Cycle Arrest after  
478 Activation of the Unfolded Protein Response Pathway. *Molecular Biology of*  
479 *the Cell*, 16: 5493-5501.
- 480 34. Shenton D, Smirnova JB, Selley JN, Carroll K, Hubbard SJ, Pavitt GD, Ashe  
481 MP and Grant CM. 2006. Global translational responses to oxidative stress  
482 impact upon multiple levels of protein synthesis. *The Journal of biological*  
483 *chemistry*, 281: 29011-29021.
- 484 35. Dever TE. 2002. Gene-specific regulation by general translation factors. *Cell*,  
485 108: 545-556.
- 486 36. Hagan IM, Grallert A and Simanis V. 2016. Synchronizing Progression of  
487 *Schizosaccharomyces pombe* Cells from G2 through Repeated Rounds of  
488 Mitosis and S Phase with *cdc25-22* Arrest Release. *Cold Spring Harbor*  
489 *protocols*, 2016: pdb prot091264.
- 490 37. Hagan IM, Grallert A and Simanis V. 2016. Synchronizing Progression of  
491 *Schizosaccharomyces pombe* Cells from Prophase through Mitosis and into S  
492 Phase with *nda3-KM311* Arrest Release. *Cold Spring Harbor protocols*, 2016:  
493 pdb prot091256.
- 494 38. Hagan IM, Grallert A and Simanis V. 2016. Cell Cycle Synchronization of  
495 *Schizosaccharomyces pombe* by Centrifugal Elutriation of Small Cells. *Cold*  
496 *Spring Harbor protocols*, 2016: pdb prot091231.
- 497 39. Moreno S, Klar A and Nurse P. 1991. Molecular genetic analysis of fission  
498 yeast *Schizosaccharomyces pombe*. *Methods Enzymol.*, 194: 795-823.
- 499 40. Bahler J, Wu JQ, Longtine MS, Shah NG, McKenzie A, III, Steever AB,  
500 Wach A, Philippsen P and Pringle JR. 1998. Heterologous modules for  
501 efficient and versatile PCR-based gene targeting in *Schizosaccharomyces*  
502 *pombe*. *Yeast*, 14: 943-951.

503

504

505 **Figure 1. Global translation in cells synchronized in the cell cycle**

506 Cells of the indicated strains were grown exponentially at 25°C (**A, B, E-G**) or 30 °C  
507 (**C, D, H, I**), incubated at 36°C or 20°C for one generation time and then shifted back  
508 to 25 and 30 °C, respectively. Samples were taken at the indicated times after the  
509 shift. **A, C** median intensities of the AF647 (HGP) signal normalized to that of  
510 exponentially growing cells. Average of three biological repeats and standard errors  
511 (SE) are shown. **B, D** illustrate cell-cycle progression in the respective mutants. Fig  
512 S1 shows the cell-cycle distributions **E - I** Quantification of eIF2 $\alpha$  phosphorylation  
513 normalized to tubulin in the indicated strains. Average and SE of three independent  
514 experiments are shown. Representative immunoblots are shown in Fig S2.

515 **Figure 2. Global translation in exponentially growing cells**

516 **A,B** Two-parametric flow cytometry plots of fission yeast cells grown in (**A**) EMM or  
517 (**B**) in isoleucine-minimal medium. **C, D** Average of median intensity of the AF647  
518 signal normalized to G2 (**C**) or G1 (**D**) from at least three biological repeats with SE.  
519 Gating is shown on Fig S2.

520 **Figure 3. Global translation through the cell cycle in human cells**

521 **A-C** Two-parametric flow cytometry plots of the indicated cell lines. Yellow lines  
522 represent the mean intensity of AF647 (OPP) for each cell-cycle phase. **D-F** Bar  
523 graphs representing mean AF647 (OPP) intensity with standard deviation. **G**  
524 Quantification of eIF2 $\alpha$  phosphorylation normalized to eIF2 $\alpha$  in the indicated cell-  
525 cycle phases. Exponentially growing HeLa cells were fixed and stained for H3-P and

526 DNA content to identify cells in each cell-cycle phase and then 50 000 cells from each  
527 phase were sorted to measure eIF2 $\alpha$  phosphorylation. Average and SE of three  
528 independent experiments are shown. Representative immunoblots are shown in Fig  
529 S3. **H.** Two-parametric flow cytometry plots of asynchronously growing and  
530 nocodazole-arrested cells and cells 4 h after release from the nocodazole block. **I** Bar  
531 graphs representing mean AF647 (OPP) intensity with standard deviation after  
532 nocodazole block and release. eIF2 $\alpha$  phosphorylation is shown in Fig S3.

### 533 **Figure 4. eIF2 $\alpha$ phosphorylation and general translation**

534 Cells carrying the indicated plasmids were grown exponentially with the promoter  
535 repressed and one sample was taken to measure translation. The promoter was  
536 induced for the indicated times. **A, B** Quantification of eIF2 $\alpha$  phosphorylation  
537 normalized to  $\alpha$ -tubulin at the indicated time points when PKR is expressed from the  
538 two different promoters. Note the different scales on the y axes. Representative  
539 immunoblots are shown in Fig S4. **C** Quantification of eIF2 $\alpha$  phosphorylation  
540 normalized to tubulin after the indicated stresses. Average and SE of three  
541 independent experiments are shown. Representative immunoblots are shown in Fig  
542 S4. **D** Median intensities of the AF647 (HGP) signal normalized to that of  
543 exponentially growing cells (promoter repressed). Average of three biological repeats  
544 and SE are shown.

545

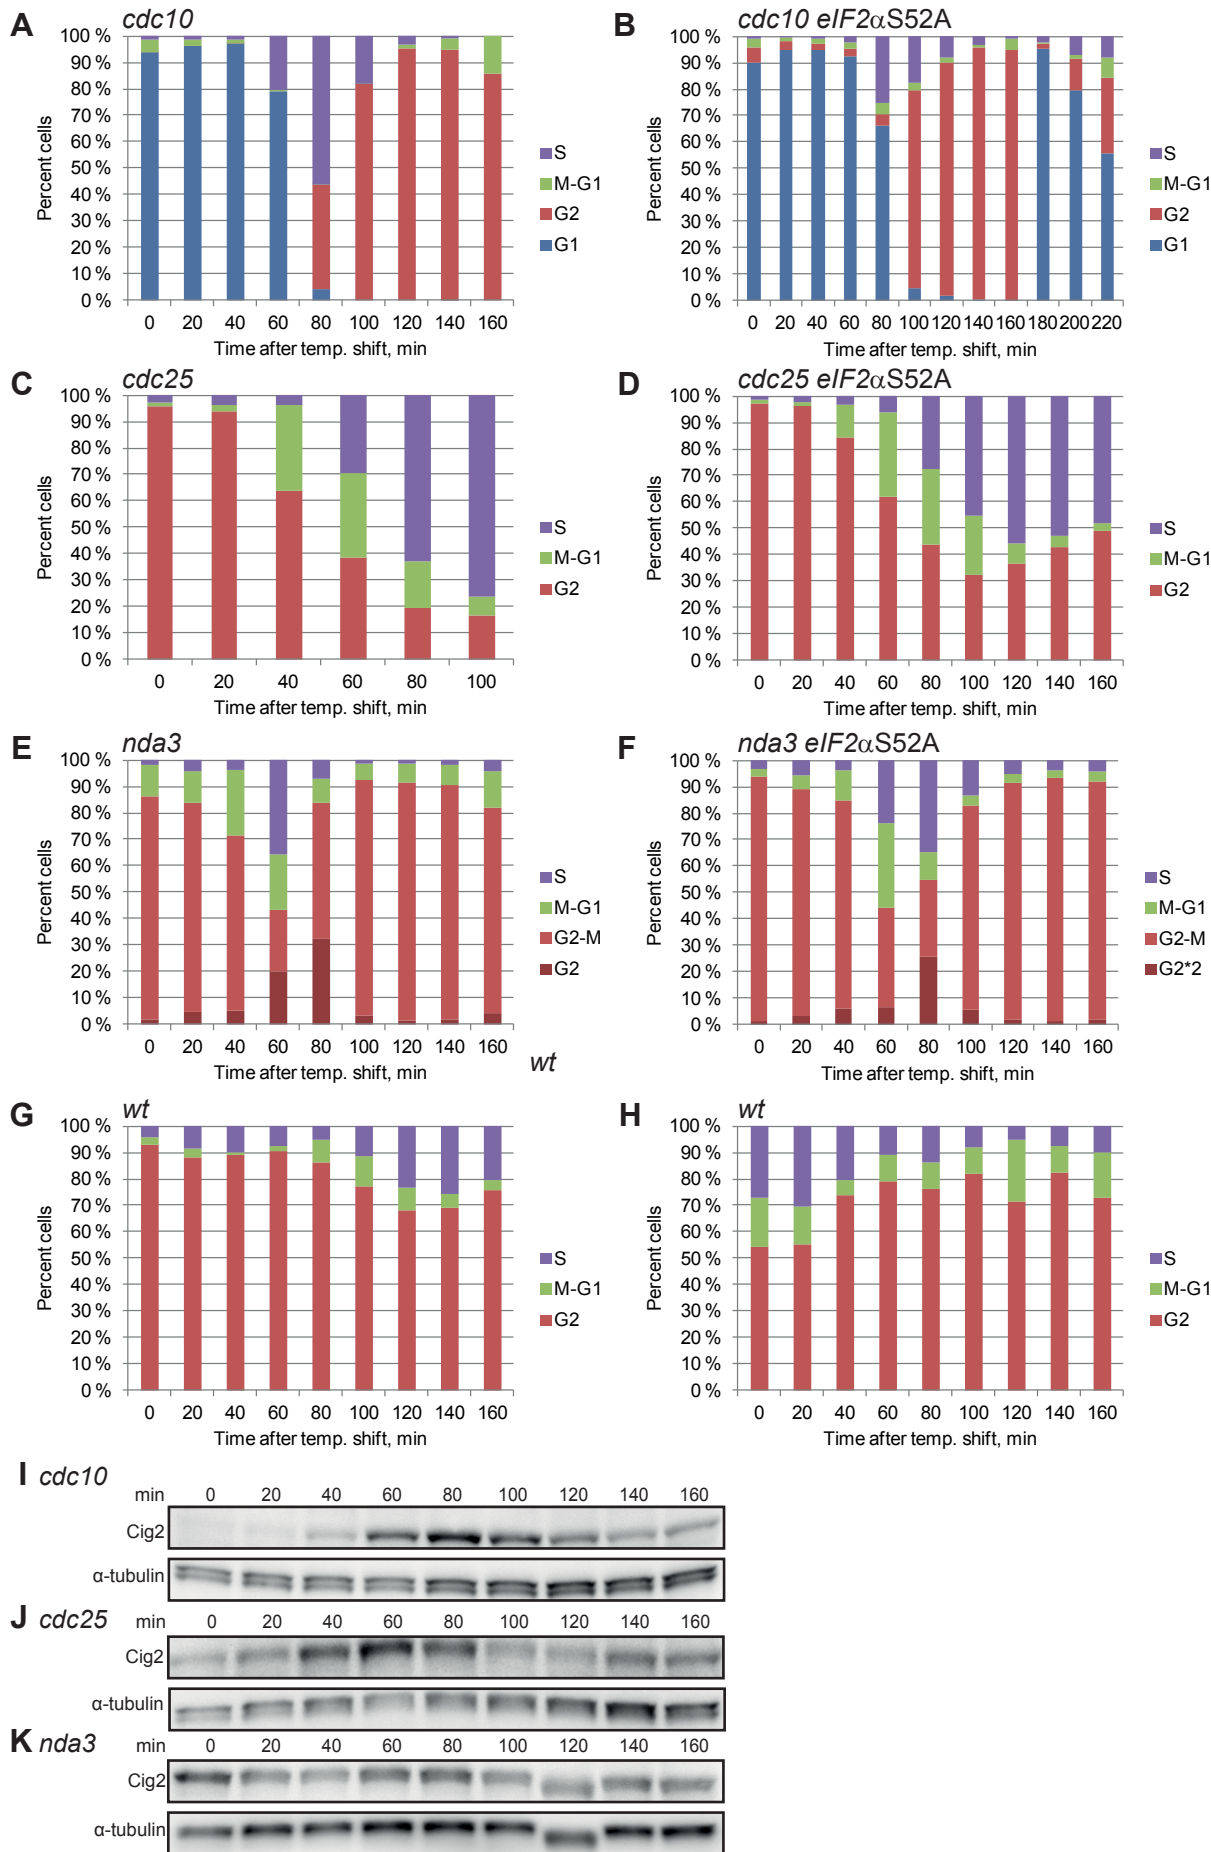

**Fig S1, related to Fig 1.**

**A-H** Cell-cycle progression in the cell-cycle synchronization experiments.

**I-K** Representative immunoblots of the cell-cycle-regulated Cig2 cyclin in the indicated mutants.  $\alpha$ -tubulin is shown as loading control.



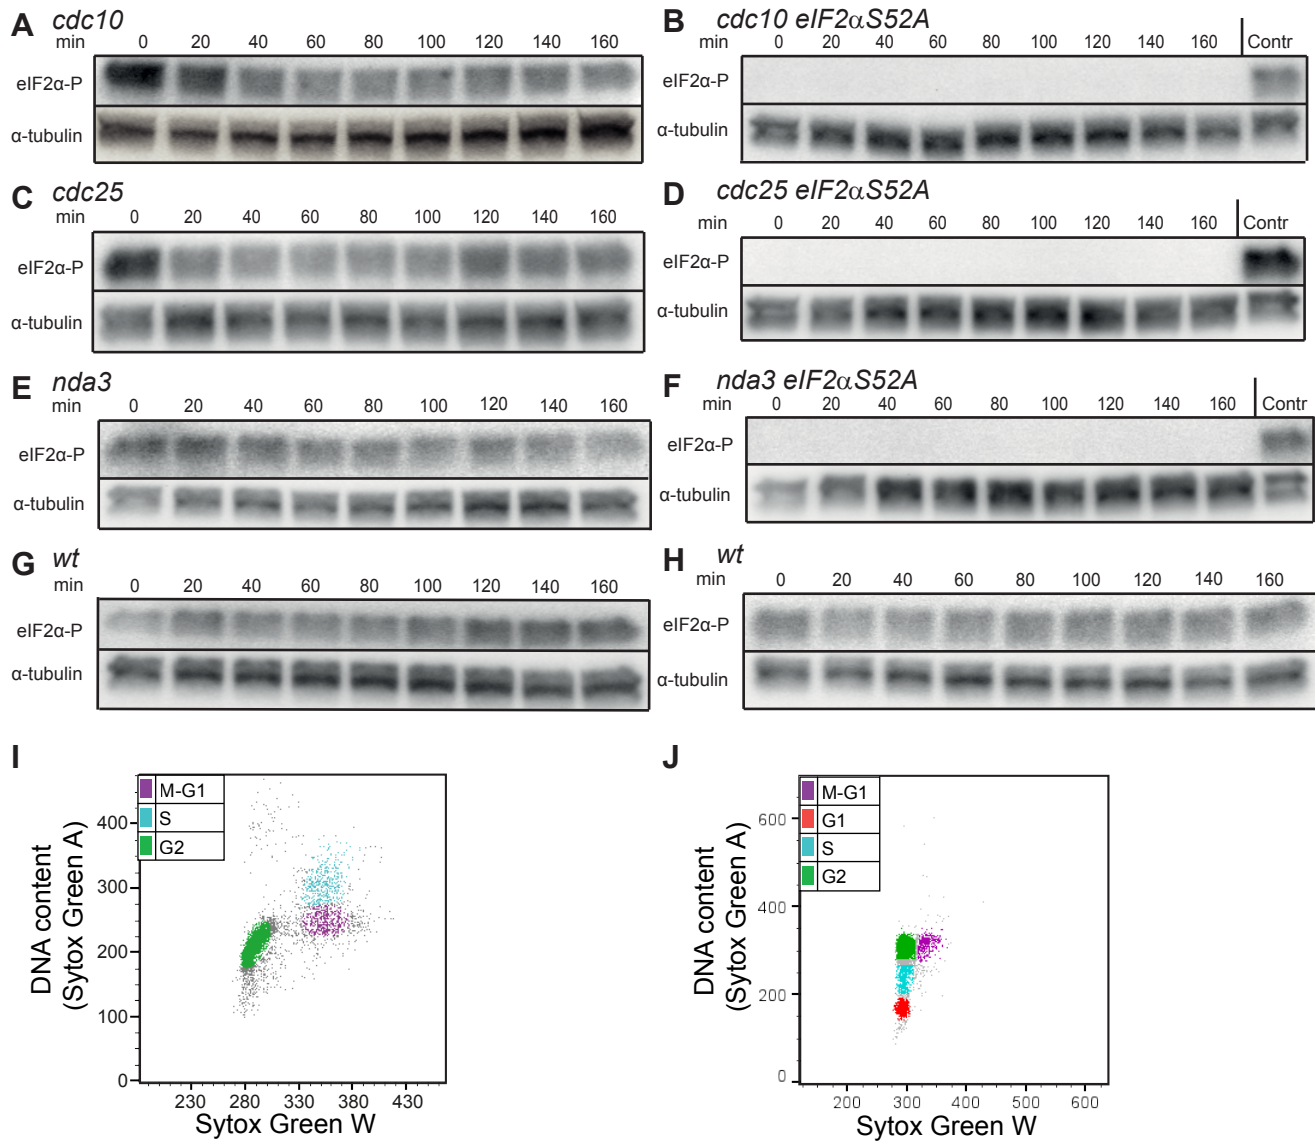

**Fig S2, related to Fig 1 and Fig2.**

**A - H** Representative immunoblots showing eIF2α phosphorylation and tubulin loading control in the indicated strains.

**I-J** Two-parametric DNA histograms showing gating used for the plot shown in Fig. 2A, B.



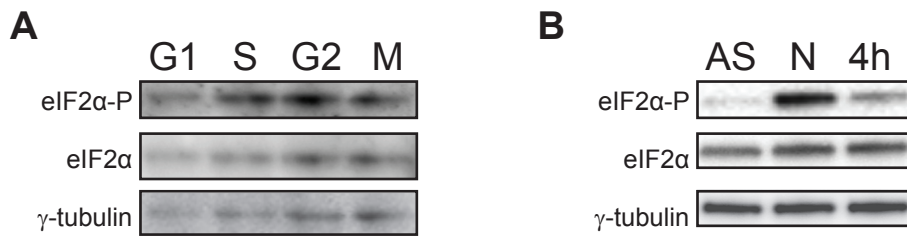

**Fig S3 related to Fig. 3. A** eIF2 $\alpha$  phosphorylation in the different cell-cycle phases. **B** eIF2 $\alpha$  phosphorylation in asynchronous (AS) and nocodazole-arrested cells (N) and 4h after release from a nocodazole arrest (4h).

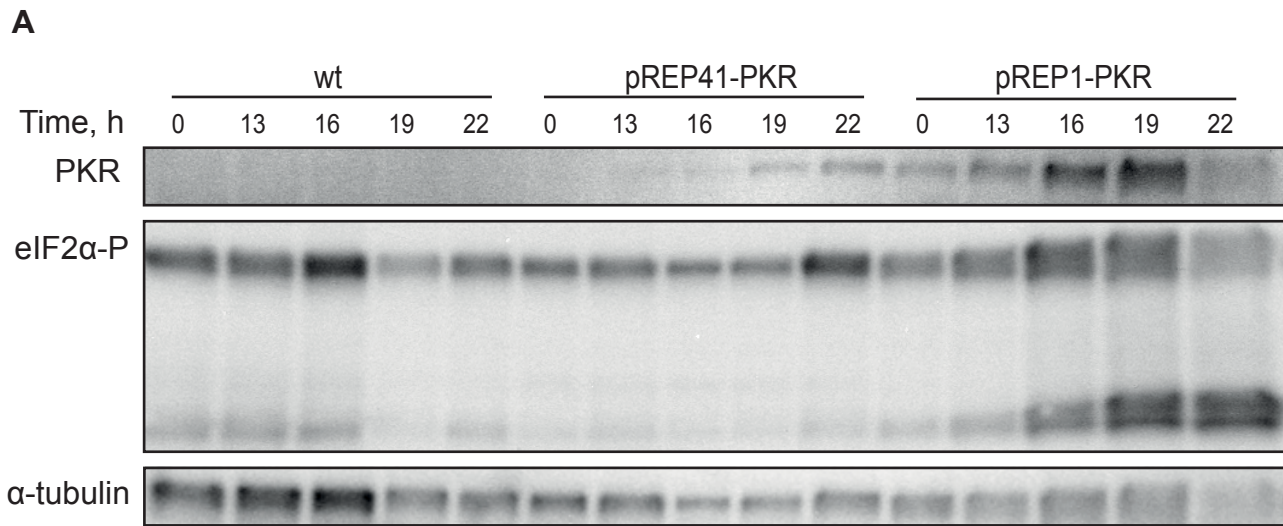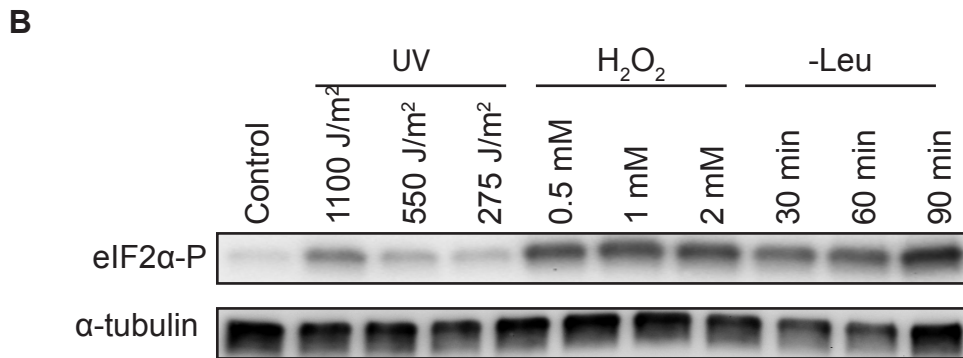

**Fig S4 related to Fig 4.**

**A** Representative immunoblots showing PKR expression, eIF2α phosphorylation and loading controls in the indicated strains. **B** Representative immunoblot showing eIF2α phosphorylation and loading control in a wild-type strain after treatment with the indicated stresses.

## 546 **Supplementary figure legends**

547 **Fig S1, related to Fig 1. A-H** Cell-cycle progression in the cell-cycle

548 synchronization experiments. **I-K** Representative immunoblots of the cell-cycle-

549 regulated Cig2 cyclin in the indicated mutants.  $\alpha$ -tubulin is shown as loading control.

550 **Fig S2, related to Fig 1 and Fig2. A - H** Representative immunoblots showing

551 eIF2 $\alpha$  phosphorylation and tubulin loading control in the indicated strains. **I-J** Two-

552 parametric DNA histograms showing gating used for the plot shown in Fig. 2A, B.

553 **Fig S3 related to Fig. 3. A** eIF2 $\alpha$  phosphorylation in the different cell-cycle

554 phases. **B** eIF2 $\alpha$  phosphorylation in asynchronous (AS) and nocodazole-arrested cells

555 (N) and 4h after release from a nocodazole arrest (4h).

556 **Fig S4 related to Fig 4. A** Representative immunoblots showing PKR expression,

557 eIF2 $\alpha$  phosphorylation and loading controls in the indicated strains. **B** Representative

558 immunoblot showing eIF2 $\alpha$  phosphorylation and loading control in a wild-type strain

559 after treatment with the indicated stresses.
